# Supplementary material
Source: publisher figshare collection journal article supplement (https://gsapubs.figshare.com/ndownloader/files/22747169)
Supplement: Supplementary file 1 [file 22747169]

## Data Repository Item

**U-Pb Analytical Methods**

Zircons were separated from each of the seven 1 to 4 kg samples (see Fig. 1 for locations) by standard crushing and gravimetric techniques, picked in alcohol on the basis of lack of inclusions and fractures, mounted in 2.54 cm epoxy rounds, and polished to expose the grain interiors. Cathodoluminescence (CL) and transmitted/reflected light images were used to characterize the grains and select spots for analysis. Zircons were analyzed for U-Pb on the SHRIMP-RG (sensitive high resolution ion microprobe-reverse geometry) instrument at the United States Geological Survey-Stanford University Ion Probe Laboratory, Stanford, CA. A spot size of ca. 25-30  $\mu\text{m}$  in diameter was used for all analyses. The analytical routine followed Williams (1998) and Barth et al. (2001) and data reduction and age calculation utilized the SQUID program of Ludwig (2001). The concentration of U was calibrated using zircon standard CZ3 (U = 550 ppm). Isotopic compositions were calibrated by replicate analyses of zircon standard R33 (419 Ma; Black et al., 2004). Zircons from the samples were analyzed over several sessions and several different mounts. Calibration errors for the  $^{206}\text{Pb}/^{238}\text{U}$  ratios of R33 for the three different analytical sessions were 0.55%, 0.87%, and 0.38% ( $2\sigma$ ). Discussion and interpretation of analyses are based on the weighted mean of  $^{206}\text{Pb}/^{238}\text{U}$  ages calculated from ratios corrected for common Pb using the  $^{207}\text{Pb}$  method. Common Pb compositions were estimated from Stacey and Kramers (1975). Analyses were grouped by age and interpreted in context of core versus rim domains determined by CL imaging and allowance for isotopic complexity due to the effects of inheritance, Pb-loss, or metamorphic overgrowths. Ages were calculated as inverse-variance weighted mean  $^{206}\text{Pb}/^{238}\text{U}$  ages with errors reported at the 95% confidence level. Tera-Wasserburg diagrams were generated with the Isoplot/Ex program of Ludwig (2003). Analytical results are presented in Table DR1 and plotted in Figure DR2.

## Data Repository Item

Figure DR1. Lower-hemisphere, equal-area projections of structural fabric data from four study areas in the transition between the western Idaho shear zone and Orofino shear zone in west-central Idaho (see Fig. 1 for locations). Five generations of superposed structures are recognized in the region. First structures (D1) consist of at least two generations of nearly parallel penetrative foliations and folds. D2 and D3 structures consist of folds, cleavage, and mylonitic fabrics that are related to the western Idaho shear zone and Orofino shear zone, respectively. D4 and D5 structures are minor folds and crenulation cleavage associated with low-strain deformation that post-dates the Orofino shear zone. Along the South Fork of the Clearwater River, superposition relations between pre-145 Ma structures in rocks of the Salmon River belt (D1) and younger northeast-trending foliations (D2) of the western Idaho shear zone are well established. Along the Middle Fork of the Clearwater River, D1 structures are found in rocks of the Salmon River belt and in schist and gneiss with Proterozoic and Mesozoic protoliths and are overprinted by northeast-trending foliations (D2) of the western Idaho shear zone. From the South Fork to the Middle Fork, northwest-trending minor folds with crenulation and spaced cleavage (D3) attributed to the Orofino shear zone progressively increase in development from south to north. At Greer, a Jura-Cretaceous quartz diorite plutonic complex (Kauffman et al., 2006) is deformed in western Idaho shear zone structures (D2) that consist of at least two penetrative foliations that are progressively transposed into near parallelism with D3 mylonitic fabrics of the Orofino shear zone. At Dworshak, paragneiss contains D1 structures that consist of at least two generations of nearly parallel isoclinal folds with a pervasive penetrative axial-planar cleavage; the folds are defined by compositional layering in meta-sedimentary rocks assigned to the Salmon River belt. The composite D1 structures at Dworshak are interpreted to be transposed equivalents of the Salmon River belt and possibly of the western Idaho shear zone to the south. At Greer, early structures (D2) are, from south to north over a distance of a few hundred meters, progressively transposed into the fabrics of the Orofino shear zone where D3 structures consist of SC mylonite with top-to-the south shear indicated by tails on feldspar porphyroblasts. The strain increases from the margin to the interior of the shear zone and is reflected in the progressive decrease in SC angle to essentially zero and an associated increase in foliation dip from  $\sim 30^\circ$  to  $\sim 80^\circ$  over distances of a few hundred meters. The D3 mylonite is divided into at least two generations with steeply dipping structures over-printed by shallowly north-dipping SC mylonite. At Dworshak, S and C surfaces of D3 structures are essentially parallel and represent the first generation of fabric within the Cretaceous tonalite ( $\sim 90$  to  $\sim 70$  Ma) contained within the Orofino shear zone.

## Data Repository Item

TABLE DR1. U-Pb SHRIMP GEOCHRONOLOGIC DATA AND APPARENT AGES

| Spot                                                                          | U <sup>†</sup><br>(ppm) | Th<br>(ppm) | Th/U  | <sup>206</sup> Pb* <sup>†</sup><br>(ppm) | f <sup>206</sup> Pb <sub>c</sub> <sup>†</sup> | <sup>238</sup> U/ <sup>206</sup> Pb <sup>§</sup> | <sup>207</sup> Pb/ <sup>206</sup> Pb <sup>§</sup> | <sup>206</sup> Pb/ <sup>238</sup> U <sup>#</sup><br>(Ma) |
|-------------------------------------------------------------------------------|-------------------------|-------------|-------|------------------------------------------|-----------------------------------------------|--------------------------------------------------|---------------------------------------------------|----------------------------------------------------------|
| <u>Sample 1. Trondhjemite (99-01)</u> (N 45° 54' 30.9"; W 116° 00' 28.5")     |                         |             |       |                                          |                                               |                                                  |                                                   |                                                          |
| 1.1                                                                           | 170                     | 18          | 0.1   | 2                                        | 1.9                                           | 59.47 (4)                                        | 0.0629 (13)                                       | 106 (4)                                                  |
| 2.1                                                                           | 234                     | 37          | 0.2   | 3                                        | 0.5                                           | 57.95 (3)                                        | 0.0525 (11)                                       | 110 (3)                                                  |
| 3.1                                                                           | 211                     | 36          | 0.2   | 3                                        | 0.3                                           | 58.52 (3)                                        | 0.0505 (11)                                       | 109 (3)                                                  |
| 4.1                                                                           | 180                     | 29          | 0.2   | 3                                        | -                                             | 56.35 (4)                                        | 0.0469 (12)                                       | 114 (4)                                                  |
| 5.1                                                                           | 499                     | 73          | 0.2   | 8                                        | 0.4                                           | 56.46 (2)                                        | 0.0517 (7)                                        | 113 (2)                                                  |
| 6.1                                                                           | 327                     | 63          | 0.2   | 5                                        | 1.8                                           | 58.56 (3)                                        | 0.0622 (8)                                        | 107 (3)                                                  |
| 7.1                                                                           | 271                     | 47          | 0.2   | 4                                        | 1.0                                           | 56.15 (3)                                        | 0.0560 (10)                                       | 113 (3)                                                  |
| 7.2                                                                           | 179                     | 32          | 0.2   | 3                                        | 3.6                                           | 56.68 (4)                                        | 0.0765 (17)                                       | 109 (5)                                                  |
| 8.1                                                                           | 245                     | 38          | 0.2   | 4                                        | 1.0                                           | 56.85 (3)                                        | 0.0559 (10)                                       | 111 (3)                                                  |
| 9.1                                                                           | 206                     | 46          | 0.2   | 3                                        | 0.6                                           | 57.53 (3)                                        | 0.0530 (11)                                       | 110 (4)                                                  |
| 10.1                                                                          | 404                     | 64          | 0.2   | 6                                        | 0.5                                           | 56.91 (2)                                        | 0.0523 (8)                                        | 112 (3)                                                  |
| 11.1                                                                          | 225                     | 44          | 0.2   | 4                                        | -                                             | 53.95 (3)                                        | 0.0473 (11)                                       | 119 (4)                                                  |
| 12.1                                                                          | 327                     | 62          | 0.2   | 5                                        | 0.0                                           | 57.23 (3)                                        | 0.0480 (12)                                       | 112 (3)                                                  |
| 13.1                                                                          | 414                     | 91          | 0.2   | 6                                        | 0.3                                           | 58.31 (2)                                        | 0.0503 (8)                                        | 109 (2)                                                  |
| 14.1                                                                          | 92                      | 8           | 0.1   | 1                                        | 1.9                                           | 57.37 (5)                                        | 0.0629 (16)                                       | 109 (6)                                                  |
| <u>Sample 2. Biotite tonalite (99-02)</u> (N 45° 49' 26.4"; W 115° 54' 55.8") |                         |             |       |                                          |                                               |                                                  |                                                   |                                                          |
| 1.1                                                                           | 564                     | 257         | 0.5   | 6                                        | -                                             | 77.49 (2)                                        | 0.0466 (2)                                        | 83 (2)                                                   |
| 2.1                                                                           | 218                     | 110         | 0.5   | 2                                        | 2.1                                           | 77.87 (4)                                        | 0.0647 (4)                                        | 81 (3)                                                   |
| 3.1                                                                           | 105                     | 75          | 0.7   | 1                                        | 0.7                                           | 66.59 (5)                                        | 0.0532 (5)                                        | 95 (5)                                                   |
| 4.1                                                                           | 752                     | 274         | 0.4   | 8                                        | 0.4                                           | 76.79 (2)                                        | 0.0507 (2)                                        | 83 (2)                                                   |
| 5.1                                                                           | 641                     | 222         | 0.4   | 8                                        | 0.1                                           | 72.83 (2)                                        | 0.0489 (2)                                        | 88 (2)                                                   |
| 6.1                                                                           | 686                     | 387         | 0.6   | 9                                        | -                                             | 67.70 (2)                                        | 0.0460 (2)                                        | 95 (2)                                                   |
| 7.1                                                                           | 522                     | 218         | 0.4   | 6                                        | 1.7                                           | 72.00 (2)                                        | 0.0610 (2)                                        | 87 (2)                                                   |
| 8.1                                                                           | 565                     | 208         | 0.4   | 7                                        | 0.1                                           | 72.62 (2)                                        | 0.0485 (2)                                        | 88 (2)                                                   |
| 9.1                                                                           | 377                     | 154         | 0.4   | 5                                        | 0.5                                           | 67.21 (3)                                        | 0.0519 (3)                                        | 95 (3)                                                   |
| 9.2                                                                           | 517                     | 220         | 0.4   | 7                                        | 0.2                                           | 66.14 (2)                                        | 0.0497 (2)                                        | 97 (2)                                                   |
| 10.1                                                                          | 119                     | 15          | 0.1   | 1                                        | -                                             | 74.92 (5)                                        | 0.0431 (5)                                        | 86 (4)                                                   |
| 11.1                                                                          | 505                     | 188         | 0.4   | 6                                        | 0.1                                           | 76.50 (2)                                        | 0.0483 (2)                                        | 84 (2)                                                   |
| 12.1                                                                          | 397                     | 170         | 0.4   | 4                                        | 0.9                                           | 76.94 (3)                                        | 0.0551 (3)                                        | 82 (2)                                                   |
| 12.2                                                                          | 389                     | 125         | 0.3   | 5                                        | 0.1                                           | 72.46 (3)                                        | 0.0490 (3)                                        | 88 (2)                                                   |
| 13.1                                                                          | 540                     | 183         | 0.3   | 6                                        | 0.4                                           | 75.60 (2)                                        | 0.0508 (2)                                        | 84 (2)                                                   |
| 14.1                                                                          | 514                     | 197         | 0.4   | 6                                        | 1                                             | 72.36 (2)                                        | 0.0546 (2)                                        | 88 (2)                                                   |
| <u>Sample 3. Biotite tonalite (00-84)</u> (N 46° 31' 42.5"; W 116° 17' 27.4") |                         |             |       |                                          |                                               |                                                  |                                                   |                                                          |
| 1.1                                                                           | 97                      | 17          | 0.2   | 3                                        | 0.7                                           | 28.21 (2)                                        | 0.0559 (5)                                        | 223 (4)                                                  |
| 2.1                                                                           | 253                     | 13          | 0.1   | 3                                        | 0.6                                           | 72.53 (2)                                        | 0.0522 (6)                                        | 88 (1)                                                   |
| 3.1                                                                           | 171                     | 49          | 0.3   | 6                                        | 0.2                                           | 26.47 (1)                                        | 0.0525 (4)                                        | 239 (3)                                                  |
| 4.1                                                                           | 1547                    | 2           | 0.001 | 20                                       | 0.2                                           | 67.25 (1)                                        | 0.0498 (2)                                        | 95 (1)                                                   |
| 5.1                                                                           | 824                     | 12          | 0.015 | 10                                       | 0.8                                           | 73.04 (1)                                        | 0.0544 (3)                                        | 87 (1)                                                   |
| 6.1                                                                           | 168                     | 46          | 0.3   | 5                                        | 0.4                                           | 26.55 (1)                                        | 0.0540 (4)                                        | 237 (3)                                                  |
| 7.1                                                                           | 41                      | 9           | 0.2   | 1                                        | 8.3                                           | 36.72 (3)                                        | 0.1151 (11)                                       | 159 (5)                                                  |

## Data Repository Item

| Spot | U <sup>†</sup><br>(ppm) | Th<br>(ppm) | Th/U | <sup>206</sup> Pb* <sup>†</sup><br>(ppm) | f <sup>206</sup> Pb <sub>c</sub> <sup>†</sup> | <sup>238</sup> U/ <sup>206</sup> Pb <sup>§</sup> | <sup>207</sup> Pb/ <sup>206</sup> Pb <sup>§</sup> | <sup>206</sup> Pb/ <sup>238</sup> U <sup>#</sup><br>(Ma) |
|------|-------------------------|-------------|------|------------------------------------------|-----------------------------------------------|--------------------------------------------------|---------------------------------------------------|----------------------------------------------------------|
|------|-------------------------|-------------|------|------------------------------------------|-----------------------------------------------|--------------------------------------------------|---------------------------------------------------|----------------------------------------------------------|

Sample 3 (CONTINUED)

|      |      |     |       |    |     |       |       |        |     |     |     |
|------|------|-----|-------|----|-----|-------|-------|--------|-----|-----|-----|
| 8.1  | 1019 | 156 | 0.2   | 21 | -   | 41.97 | (0.6) | 0.0484 | (2) | 152 | (1) |
| 9.1  | 2921 | 6   | 0.002 | 36 | 0.2 | 69.87 | (0.4) | 0.0497 | (2) | 91  | (0) |
| 10.1 | 1096 | 2   | 0.002 | 13 | 0.2 | 71.39 | (0.7) | 0.0491 | (3) | 90  | (1) |
| 11.1 | 1630 | 518 | 0.3   | 51 | 0.2 | 27.32 | (0.4) | 0.0525 | (1) | 231 | (1) |
| 12.1 | 1522 | 359 | 0.2   | 49 | 0.0 | 26.82 | (0.5) | 0.0506 | (2) | 236 | (1) |
| 13.1 | 2224 | 450 | 0.2   | 71 | 0.1 | 26.80 | (0.4) | 0.0516 | (1) | 236 | (1) |
| 14.1 | 1425 | 157 | 0.1   | 39 | 0.1 | 31.76 | (0.5) | 0.0507 | (2) | 200 | (1) |

Sample 4. Hornblende-biotite quartz diorite (00-86) (N 46° 33' 25.3"; W 116° 16' 0.3")

|      |     |     |     |    |     |       |       |        |      |      |      |
|------|-----|-----|-----|----|-----|-------|-------|--------|------|------|------|
| 1.1  | 360 | 129 | 0.4 | 4  | -   | 72.77 | (1.7) | 0.0456 | (7)  | 88   | (2)  |
| 2.1  | 467 | 163 | 0.4 | 6  | 0.4 | 72.18 | (1.5) | 0.0508 | (6)  | 88   | (1)  |
| 3.1  | 802 | 122 | 0.2 | 9  | -   | 75.77 | (1.2) | 0.0466 | (5)  | 85   | (1)  |
| 4.1  | 443 | 185 | 0.4 | 5  | -   | 70.44 | (1.6) | 0.0455 | (6)  | 91   | (1)  |
| 5.1  | 640 | 173 | 0.3 | 8  | -   | 71.99 | (1.4) | 0.0472 | (5)  | 89   | (1)  |
| 5.2  | 476 | 170 | 0.4 | 6  | 0.5 | 67.00 | (1.9) | 0.0517 | (7)  | 95   | (2)  |
| 6.1  | 446 | 181 | 0.4 | 5  | 0.2 | 72.23 | (1.6) | 0.0498 | (6)  | 88   | (1)  |
| 7.1  | 369 | 158 | 0.4 | 4  | 0.1 | 71.93 | (1.7) | 0.0490 | (7)  | 89   | (2)  |
| 8.1  | 611 | 177 | 0.3 | 7  | 0.1 | 71.11 | (1.3) | 0.0484 | (5)  | 90   | (1)  |
| 9.1  | 398 | 185 | 0.5 | 5  | 0.6 | 70.86 | (1.8) | 0.0529 | (7)  | 90   | (2)  |
| 10.1 | 337 | 165 | 0.5 | 4  | -   | 70.52 | (1.8) | 0.0475 | (7)  | 91   | (2)  |
| 11.1 | 208 | 174 | 0.9 | 56 | 1.2 | 3.19  | (0.7) | 0.1169 | (2)  | 1739 | (13) |
| 12.1 | 142 | 109 | 0.8 | 2  | -   | 74.13 | (3.0) | 0.0449 | (12) | 87   | (3)  |
| 13.1 | 464 | 147 | 0.3 | 5  | 0.0 | 72.88 | (1.4) | 0.0479 | (6)  | 88   | (1)  |
| 14.1 | 587 | 136 | 0.2 | 7  | -   | 71.73 | (1.4) | 0.0449 | (6)  | 90   | (1)  |
| 15.1 | 722 | 163 | 0.2 | 9  | 0.4 | 70.68 | (1.2) | 0.0510 | (5)  | 90   | (1)  |

Sample 5. Hornblende-biotite tonalite (01JPA) (N 46 18' 37.6"; W 115 48' 05.9")

|      |     |     |     |   |     |       |       |        |      |    |     |
|------|-----|-----|-----|---|-----|-------|-------|--------|------|----|-----|
| 1.1  | 486 | 209 | 0.4 | 5 | 0.9 | 86.60 | (2.1) | 0.0543 | (9)  | 73 | (2) |
| 2.1  | 251 | 88  | 0.4 | 2 | -   | 89.39 | (2.9) | 0.0463 | (11) | 72 | (2) |
| 3.1  | 200 | 63  | 0.3 | 2 | 4.8 | 88.34 | (3.8) | 0.0858 | (11) | 69 | (3) |
| 4.1  | 328 | 203 | 0.6 | 3 | 0.4 | 87.87 | (3.0) | 0.0509 | (13) | 73 | (2) |
| 5.1  | 205 | 93  | 0.5 | 2 | -   | 86.76 | (3.4) | 0.0469 | (16) | 74 | (3) |
| 6.1  | 338 | 208 | 0.6 | 3 | 0.5 | 89.47 | (4.5) | 0.0515 | (10) | 71 | (3) |
| 7.1  | 372 | 157 | 0.4 | 4 | -   | 88.75 | (2.8) | 0.0426 | (11) | 73 | (2) |
| 8.1  | 267 | 108 | 0.4 | 3 | 1.1 | 82.08 | (3.3) | 0.0564 | (11) | 77 | (3) |
| 9.1  | 292 | 121 | 0.4 | 3 | -   | 85.85 | (3.3) | 0.0439 | (13) | 75 | (3) |
| 10.1 | 305 | 135 | 0.5 | 3 | 0.1 | 91.26 | (3.4) | 0.0483 | (17) | 70 | (2) |
| 11.1 | 375 | 160 | 0.4 | 4 | 1.0 | 84.21 | (2.8) | 0.0554 | (10) | 75 | (2) |
| 12.1 | 191 | 63  | 0.3 | 2 | 0.7 | 99.46 | (4.2) | 0.0532 | (15) | 64 | (3) |
| 13.1 | 287 | 112 | 0.4 | 3 | -   | 83.13 | (3.2) | 0.0469 | (12) | 77 | (2) |
| 14.1 | 366 | 147 | 0.4 | 4 | -   | 87.40 | (2.9) | 0.0462 | (11) | 73 | (2) |

## Data Repository Item

| Spot                                                                             | U <sup>†</sup><br>(ppm) | Th<br>(ppm) | Th/U | <sup>206</sup> Pb* <sup>†</sup><br>(ppm) | f <sup>206</sup> Pb <sub>c</sub> <sup>†</sup> | <sup>238</sup> U/ <sup>206</sup> Pb <sup>§</sup> | <sup>207</sup> Pb/ <sup>206</sup> Pb <sup>§</sup> | <sup>206</sup> Pb/ <sup>238</sup> U <sup>#</sup><br>(Ma) |
|----------------------------------------------------------------------------------|-------------------------|-------------|------|------------------------------------------|-----------------------------------------------|--------------------------------------------------|---------------------------------------------------|----------------------------------------------------------|
| <u>Sample 6. Leucocratic pegmatite (01JPC)</u> (N 46 30' 42.7"; W 116 19' 35.9") |                         |             |      |                                          |                                               |                                                  |                                                   |                                                          |
| 1.1                                                                              | 557                     | 26          | 0.05 | 6                                        | -                                             | 74.77 (1.9)                                      | 0.0397 (7)                                        | 87 (2)                                                   |
| 2.1                                                                              | 278                     | 10          | 0.04 | 3                                        | -                                             | 74.94 (2.6)                                      | 0.0365 (11)                                       | 87 (2)                                                   |
| 3.1                                                                              | 66                      | 26          | 0.4  | 1                                        | -                                             | 62.34 (7.2)                                      | 0.0403 (16)                                       | 104 (8)                                                  |
| 4.1                                                                              | 379                     | 23          | 0.06 | 5                                        | 0.8                                           | 72.28 (2.1)                                      | 0.0539 (7)                                        | 88 (2)                                                   |
| 5.1                                                                              | 79                      | 21          | 0.3  | 1                                        | 0.4                                           | 71.63 (4.8)                                      | 0.0508 (17)                                       | 89 (4)                                                   |
| 6.1                                                                              | 533                     | 26          | 0.05 | 6                                        | -                                             | 72.56 (1.9)                                      | 0.0454 (7)                                        | 89 (2)                                                   |
| 7.1                                                                              | 134                     | 40          | 0.3  | 2                                        | 1.2                                           | 70.80 (3.6)                                      | 0.0573 (14)                                       | 89 (3)                                                   |
| 8.1                                                                              | 566                     | 28          | 0.05 | 6                                        | 0.7                                           | 76.98 (1.9)                                      | 0.0532 (6)                                        | 83 (2)                                                   |
| 9.1                                                                              | 188                     | 70          | 0.4  | 2                                        | 0.1                                           | 72.32 (4.6)                                      | 0.0489 (12)                                       | 88 (4)                                                   |

Sample 7. Leucocratic pegmatite (01JPB) (N 46 18' 38.4"; W 115 48' 04.7")

|      |     |     |     |     |     |             |             |           |
|------|-----|-----|-----|-----|-----|-------------|-------------|-----------|
| 1.1  | 209 | 99  | 0.5 | 2   | 1.1 | 83.36 (3.7) | 0.0563 (13) | 76 (3)    |
| 2.1  | 138 | 42  | 0.3 | 1   | -   | 86.90 (4.6) | 0.0433 (18) | 74 (3)    |
| 3.1  | 189 | 53  | 0.3 | 2   | -   | 94.32 (3.9) | 0.0404 (16) | 69 (3)    |
| 4.1  | 220 | 93  | 0.4 | 2   | -   | 86.59 (3.5) | 0.0427 (14) | 74 (3)    |
| 5.1  | 470 | 462 | 1.0 | 5   | -   | 85.99 (2.4) | 0.0424 (12) | 75 (2)    |
| 6.1  | 194 | 100 | 0.5 | 2   | 1.6 | 93.95 (3.9) | 0.0598 (14) | 67 (3)    |
| 7.1  | 224 | 111 | 0.5 | 3   | 0.0 | 73.51 (4.0) | 0.0481 (13) | 87 (4)    |
| 8.1  | 229 | 116 | 0.5 | 2   | 0.0 | 85.95 (3.7) | 0.0474 (14) | 75 (3)    |
| 9.1  | 363 | 156 | 0.4 | 4   | 0.9 | 87.39 (3.0) | 0.0545 (10) | 73 (2)    |
| 9.2  | 348 | 278 | 0.8 | 71  | 0.8 | 4.21 (0.9)  | 0.0943 (2)  | 1364 (12) |
| 10.1 | 55  | 49  | 0.9 | 0.5 | 2.6 | 95.25 (7.5) | 0.0676 (24) | 66 (5)    |
| 11.1 | 392 | 159 | 0.4 | 4   | -   | 86.81 (2.8) | 0.0463 (11) | 74 (2)    |
| 11.2 | 419 | 173 | 0.4 | 4   | 0.7 | 85.07 (2.3) | 0.0533 (8)  | 75 (2)    |
| 12.1 | 376 | 166 | 0.5 | 4   | 0.2 | 89.37 (2.8) | 0.0489 (10) | 72 (2)    |
| 12.2 | 389 | 257 | 0.7 | 4   | 0.1 | 89.06 (2.5) | 0.0485 (10) | 72 (2)    |
| 13.1 | 290 | 120 | 0.4 | 3   | 2.1 | 97.04 (3.5) | 0.0639 (10) | 65 (2)    |
| 14.1 | 401 | 283 | 0.7 | 4   | 0.6 | 89.74 (2.7) | 0.0525 (9)  | 71 (2)    |
| 15.1 | 186 | 62  | 0.3 | 2   | -   | 89.64 (3.9) | 0.0440 (14) | 72 (3)    |
| 16.1 | 288 | 174 | 0.6 | 3   | 0.5 | 83.84 (3.0) | 0.0513 (19) | 76 (2)    |
| 17.1 | 365 | 144 | 0.4 | 4   | -   | 87.69 (2.9) | 0.0461 (17) | 73 (2)    |
| 18.1 | 269 | 101 | 0.4 | 3   | 0.4 | 89.11 (2.9) | 0.0504 (10) | 72 (2)    |
| 18.2 | 197 | 79  | 0.4 | 2   | -   | 87.34 (3.4) | 0.0427 (13) | 74 (3)    |

Note: All analyses were performed on the SHRIMP-RG (sensitive high mass resolution ion microprobe - reverse geometry) ion microprobe at the United States Geological Survey-Stanford Microanalytical Center, Stanford, CA.

<sup>†</sup> Pb\* denotes radiogenic Pb; Pb<sub>c</sub> denotes common Pb; f<sup>206</sup>Pb<sub>c</sub> = 100\*(<sup>206</sup>Pb<sub>c</sub>/<sup>206</sup>Pb<sub>total</sub>).

<sup>§</sup> Reported ratios are not corrected for common Pb. Errors are reported in parentheses as percent at the 1 σ level.

<sup>#</sup> Ages calculated from ratios corrected for common Pb using <sup>207</sup>Pb for the <sup>206</sup>Pb/<sup>238</sup>U age. Uncertainties in millions of years reported as 1 σ.

## Data Repository Item

**References**

- Barth, A.P., Wooden, J.L. & Coleman, D.S., 2001, SHRIMP-RG U-Pb zircon geochronology of Mesoproterozoic metamorphism and plutonism in the southwesternmost United States: *Journal of Geology*, v. 109, p. 319-327.
- Black, L.P., Kamo, S.L., Allen, C.M., Davis, D.W., Aleinikoff, J.N., Valley, J.W., Mundil, R., Campbell, I.H., Korsch, R.J., Williams, I.S., and Foudoulis, C., 2004, Improved  $^{206}\text{Pb}/^{238}\text{U}$  microprobe geochronology by the monitoring of a trace-element related matrix effect; SHRIMP, ID-TIMS, ELA-ICP-MS and oxygen isotope documentation for a series of zircon standards: *Chemical Geology*, v. 205, p. 115–140.
- Kauffman, J.D., Garwood, D.L., Schmidt, K.L., Lewis, R.S., Othberg, K.L., and Phillips, W.M., 2006, Geologic map of the Idaho parts of the Orofino and Clarkston 30 x 60 minute quadrangles: Idaho Geological Survey Digital Map Map 69, scale 1:100,000.
- Ludwig, K.R., 2001, Squid version 1.02: A users manual. Berkeley Geochronology Center Special Publication 1, p. 1-22.
- Ludwig, K.R., 2003, User's manual for Isoplot 3.00: a geochronological toolkit for Microsoft Excel: Berkeley Geochronology Center Special Publication 4, p. 1-70.
- Stacey J.S., and Kramers, J.D., 1975, Approximation of terrestrial lead isotope evolution by a two-stage model: *Earth and Planetary Science Letters*, v. 26, p. 207-221.
- Williams, I.S., 1998, U-Pb by ion microprobe, *in* McKibben, M.A., Shanks, W.C., and Ridley, W.I., eds., *Applications of microanalytical techniques to understanding mineralizing processes: Society of Economic Geologists, Reviews in Economic Geology* 7, p. 1-35.

## Data Repository Item

DR2007185

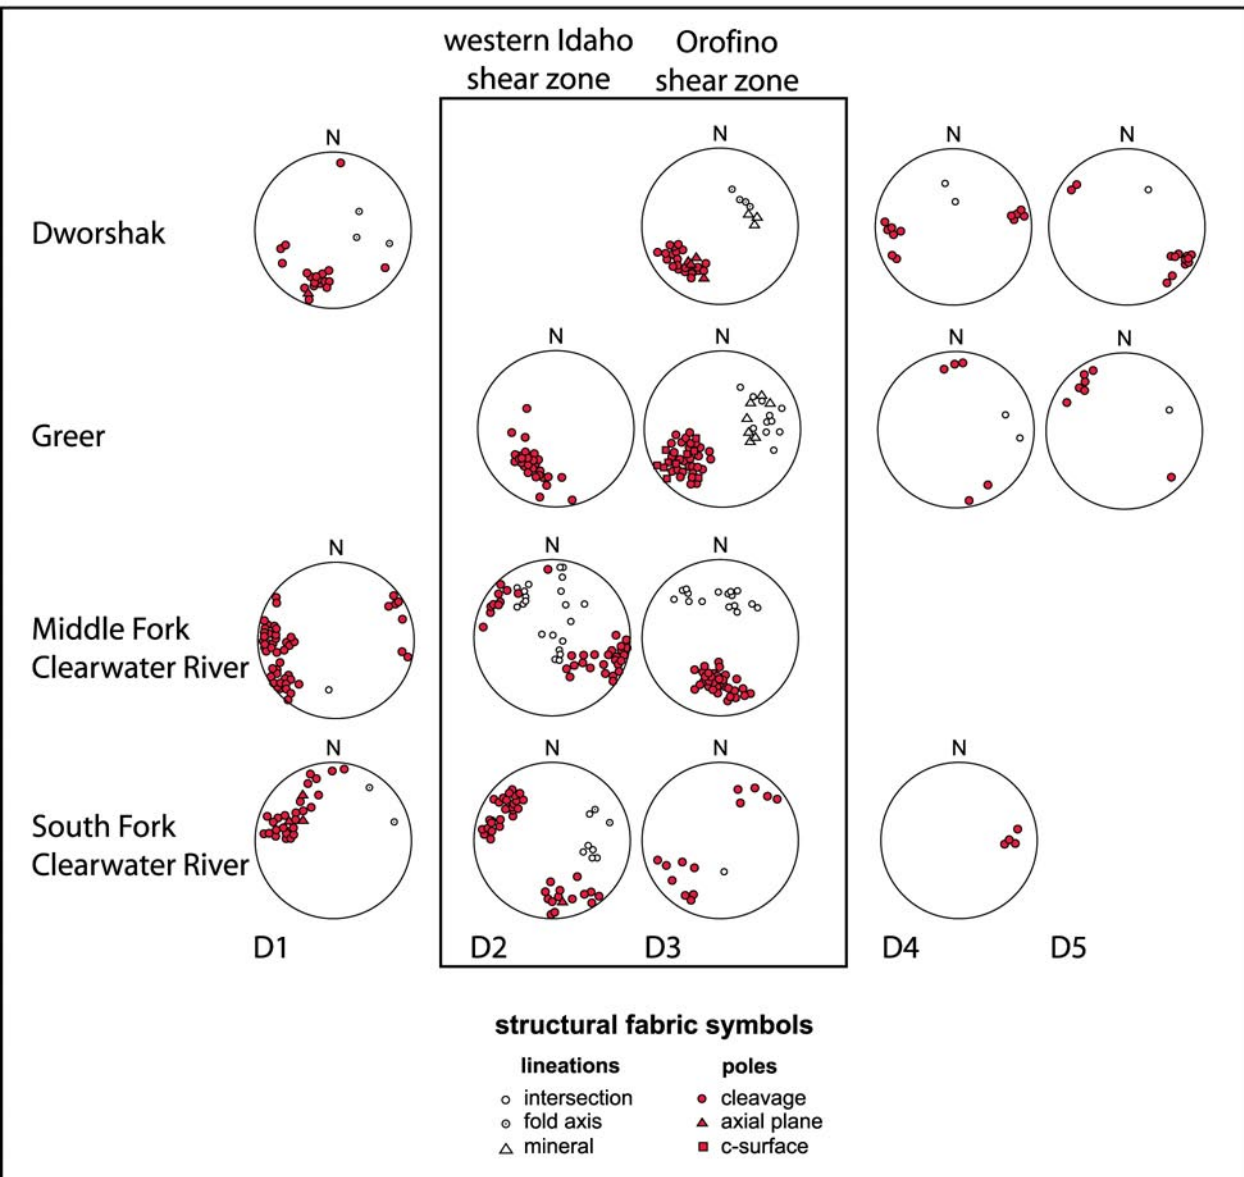

Figure DR1. See figure caption on following page for explanation.

## Data Repository Item

DR2007185

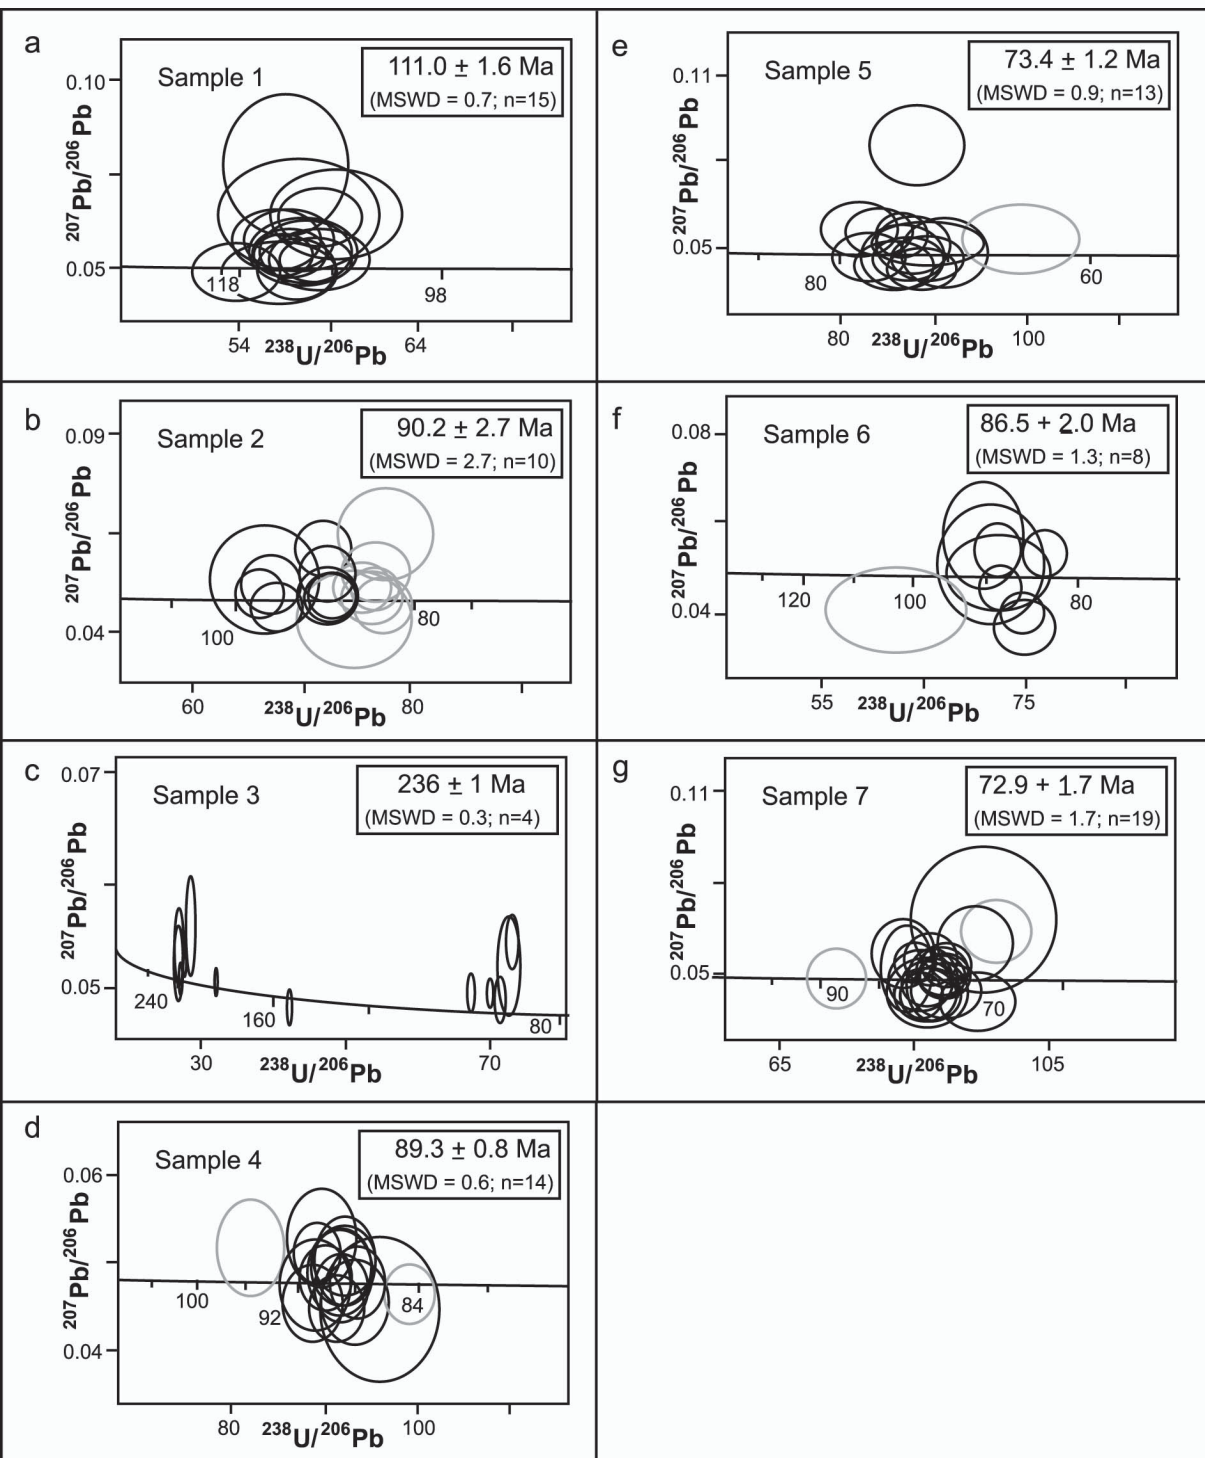

Figure DR2. Tera-Wasserburg plots of SHRIMP-RG U-Pb zircon data from sampled units (see Fig.1 for locations). Data are plotted uncorrected for common Pb as  $1\sigma$  error ellipses. Black ellipses were used in calculation of weighted mean  $^{206}\text{Pb}/^{238}\text{U}$  ages cited with errors at 95% confidence level. Grey ellipses were excluded assuming that excess scatter in  $^{206}\text{Pb}/^{238}\text{U}$  ages reflects inheritance, Pb-loss, or metamorphic overgrowth.
